# Supplementary material for: Wastewater surveillance using ddPCR accurately tracked Omicron emergence due to altered N1 probe binding efficiency
Source: Royal Society of Chemistry journal article supplement (doi:10.1039/d2ew00194b), 2022-01-01
Supplement: d2ew00194b2.xlsx [file d2ew00194b2.xlsx]

## Sheet: Supplemental_Data_1
City	Collection_Date_Start	Collection_Date_End	Sample_week	Clinical_percent_omicron	Sample_ID	Omicron_Conc_uL	Omicron_PositivesDroplets	Ave_conc_cp.uL	Ave_droplets	N1_assay_percent_omicron
Brookfield	2021-11-17	2021-11-18	2021-11-17	0	2120H1	0	0	1.385	16	1.15607
Brookfield	2021-11-24	2021-11-25	2021-11-24	0	2154H1	0.133	2	6.0875	163	1.55844
Brookfield	2021-12-01	2021-12-02	2021-12-01	0	2171H1	0	0	2.137	24.5	2.52101
Brookfield	2021-12-08	2021-12-09	2021-12-08	66.67	2207H1	0.143	2	2.6145	36.5	4.7619
Brookfield	2021-12-15	2021-12-16	2021-12-15	40	2228H1	0.655	8	4.925	60	17.4757
Brookfield	2021-12-23	2021-12-24	2021-12-22	80	2263H1	1.648	21	3.967	50.5	46.7391
Brookfield	2021-12-28	2021-12-29	2021-12-29	100	2297H1	9.075	112	11.681	144	80.2198
Brookfield	2022-01-06	2022-01-07	2022-01-05	100	2313H1	7.104	85	9.75	116.5	92.3913
Brookfield	2022-01-12	2022-01-13	2022-01-12	100	2334H1	15.119	227	19.393	290.5	98.3806
Brookfield	2022-01-19	2022-01-20	2022-01-19	100	2370H1	3.017	34	4.396	49.5	98.9247
Brookfield	2022-01-26	2022-01-27	2022-01-26	100	2392H1	2.54	35	2.795	38.5	92.5926
Green Bay DP	2021-11-17	2021-11-18	2021-11-17	0	2121H1	0.131	2	3.7585	57.5	3.92157
Green Bay DP	2021-11-24	2021-11-25	2021-11-24	0	2155H1	0.0614	1	3.6265	75.5	0.854701
Green Bay DP	2021-12-01	2021-12-02	2021-12-01	0	2172H1	0	0	3.8485	50.5	2.66667
Green Bay DP	2021-12-08	2021-12-09	2021-12-08	0	2208H1	0.269	3	5.298	59	3.0303
Green Bay DP	2021-12-15	2021-12-16	2021-12-15	0	2229H1	0.271	3	3.568	39.5	9.04523
Green Bay DP	2021-12-23	2021-12-24	2021-12-22	0	2264H1	5.055	53	12.636	132	34.8442
Green Bay DP	2021-12-28	2021-12-29	2021-12-29	NA	2298H1	6.799	105	10.9325	168.5	71.5953
Green Bay DP	2022-01-06	2022-01-07	2022-01-05	100	2314H1	3.67	39	5.037	53.5	89.3939
Green Bay DP	2022-01-12	2022-01-13	2022-01-12	NA	2335H1	8.521	118	11.7515	162.5	93.7209
Green Bay DP	2022-01-19	2022-01-20	2022-01-19	NA	2371H1	8.185	118	8.814	127	98.2935
Green Bay DP	2022-01-26	2022-01-27	2022-01-26	100	2393H1	1.753	23	2.3635	31	96.4286
Green Bay PLT	2021-11-17	2021-11-18	2021-11-17	0	2122H1	0.138	2	1.895	27.5	4.05405
Green Bay PLT	2021-11-24	2021-11-25	2021-11-24	0	2156H1	0.0676	1	7.0555	68	1.61943
Green Bay PLT	2021-12-01	2021-12-02	2021-12-01	0	2173H1	0	0	16.554	210	0.383142
Green Bay PLT	2021-12-08	2021-12-09	2021-12-08	0	2209H1	0.0822	1	4.573	55.5	4.91803
Green Bay PLT	2021-12-15	2021-12-16	2021-12-15	0	2230H1	0.252	3	7.09	84	4.81283
Green Bay PLT	2021-12-23	2021-12-24	2021-12-22	0	2265H1	1.496	18	5.121	61.5	41.4815
Green Bay PLT	2021-12-28	2021-12-29	2021-12-29	NA	2299H1	2.375	25	4.8495	51	60.0897
Green Bay PLT	2022-01-06	2022-01-07	2022-01-05	100	2315H1	29.584	349	29.8085	351.5	90.1734
Green Bay PLT	2022-01-12	2022-01-13	2022-01-12	NA	2336H1	15.818	225	20.506	291	91.7989
Green Bay PLT	2022-01-19	2022-01-20	2022-01-19	NA	2372H1	1.492	24	1.2435	20	89.7959
Green Bay PLT	2022-01-26	2022-01-27	2022-01-26	100	2394H1	2.395	34	2.1135	30	95.1613
Milwaukee JI	2021-11-17	2021-11-17	2021-11-17	0	2115H1	0.0793	1	2.619	33	3.84615
Milwaukee JI	2021-11-24	2021-11-24	2021-11-24	0	2149H1	0	0	1.433	17	0.970874
Milwaukee JI	2021-12-01	2021-12-01	2021-12-01	0.83	2166H1	0	0	4.342	59.5	3.2967
Milwaukee JI	2021-12-08	2021-12-08	2021-12-08	5.99	2202H1	0.267	3	5.567	62.5	6.55738
Milwaukee JI	2021-12-15	2021-12-15	2021-12-15	44.62	2223H1	4.696	52	8.0945	89.5	47.929
Milwaukee JI	2021-12-22	2021-12-22	2021-12-22	73.6	2258H1	4.716	70	13.5445	160.5	66.6667
Milwaukee JI	2021-12-29	2021-12-29	2021-12-29	91.67	2293H1	14.05	201	25.8195	281	85.5524
Milwaukee JI	2022-01-05	2022-01-05	2022-01-05	95.74	2308H1	14.591	184	23.5725	296	81.2317
Milwaukee JI	2022-01-12	2022-01-13	2022-01-12	95.83	2329H1	2.701	39	3.395	49	90.2439
Milwaukee JI	2022-01-19	2022-01-19	2022-01-19	98.8	2364H1	13.022	156	14.031	168	97.6471
Milwaukee JI	2022-01-26	2022-01-26	2022-01-26	100	2387H1	1.829	25	2.2315	30.5	74.4681
Milwaukee SS	2021-11-17	2021-11-17	2021-11-17	0	2116H1	0	0	2.2825	32	2.4
Milwaukee SS	2021-11-24	2021-11-24	2021-11-24	0	2150H1	0	0	0.29	14	6.66667
Milwaukee SS	2021-12-01	2021-12-01	2021-12-01	0.83	2167H1	0.634	7	0.9455	15	26.5306
Milwaukee SS	2021-12-08	2021-12-08	2021-12-08	5.99	2203H1	0.0856	1	2.871	33.5	5.88235
Milwaukee SS	2021-12-15	2021-12-15	2021-12-15	44.62	2224H1	0.432	5	1.601	18.5	28.3333
Milwaukee SS	2021-12-22	2021-12-22	2021-12-22	73.6	2261H1	1.127	13	1.777	20.5	78.8571
Milwaukee SS	2021-12-29	2021-12-29	2021-12-29	91.67	2295H1B	5.135	73	4.6075	65.5	89.4737
Milwaukee SS	2022-01-05	2022-01-05	2022-01-05	95.74	2310H1	8.528	107	7.371	92.5	91.195
Milwaukee SS	2022-01-12	2022-01-12	2022-01-12	95.83	2331H1	6.212	100	6.835	110	96.7213
Milwaukee SS	2022-01-19	2022-01-19	2022-01-19	98.8	2367H1B	1.226	20	1.1955	19.5	97.0588
Milwaukee SS	2022-01-26	2022-01-26	2022-01-26	100	2389H1	0.878	11	0.798	10	94.7368
Oregon	NA	NA	2021-11-17	NA	NA	NA	NA	NA	NA	NA
Oregon	NA	NA	2021-11-24	NA	NA	NA	NA	NA	NA	NA
Oregon	2021-12-01	2021-12-02	2021-12-01	0	2176H1	0	0	17.282	240.5	1.11732
Oregon	2021-12-08	2021-12-09	2021-12-08	1.43	2210H1	0.281	4	6.9505	98.5	3.28638
Oregon	2021-12-15	2021-12-16	2021-12-15	34.83	2231H1	0.241	3	8.3195	103	19.337
Oregon	2021-12-23	2021-12-24	2021-12-22	64.32	2266H1	2.333	32	4.342	59.5	47.8873
Oregon	2021-12-29	2021-12-30	2021-12-29	87.08	2300H1	0.176	2	1.0135	11.5	96.6102
Oregon	2022-01-06	2022-01-07	2022-01-05	96.74	2316H1	5.201	55	4.965	52.5	91.3706
Oregon	2022-01-12	2022-01-13	2022-01-12	99.3	2337H1	12.103	125	18.063	186	95.9391
Oregon	2022-01-19	2022-01-20	2022-01-19	99.23	2373H1	15.737	253	15.0505	242	100
Oregon	2022-01-26	2022-01-27	2022-01-26	100	2395H1	4.02	55	3.9835	54.5	100
Racine	2021-11-17	2021-11-18	2021-11-17	0	2118H1	0	0	5.3325	86.5	0
Racine	2021-11-24	2021-11-25	2021-11-24	0	2152H1	0.13	2	15.9935	129.5	0.854701
Racine	2021-12-01	2021-12-01	2021-12-01	0	2169H1	0	0	10.8405	143	1.89873
Racine	2021-12-08	2021-12-09	2021-12-08	0	2205H1	0.398	5	8.662	108.5	2.41935
Racine	2021-12-15	2021-12-16	2021-12-15	0	2226H1	1.508	18	12.584	149.5	13.2184
Racine	2021-12-22	2021-12-23	2021-12-22	0	2262H1	5.452	57	16.143	168	49.2255
Racine	2021-12-29	2021-12-30	2021-12-29	0	2296H1	4.468	67	8.8885	133	76.1726
Racine	2022-01-05	2022-01-06	2022-01-05	100	2311H1	30.912	423	36.451	497.5	84.9275
Racine	2022-01-12	2022-01-13	2022-01-12	100	2332H1	10.756	172	13.745	219.5	88.6719
Racine	2022-01-19	2022-01-20	2022-01-19	66.67	2368H1	10.277	172	10.489	175.5	93.75
Racine	2022-01-26	2022-01-27	2022-01-26	NA	2390H1	0.202	3	0.1685	2.5	100
